# Supplementary material for: Fc-engineered antibodies with immune effector functions completely abolished
Source: PubMed Central journal article supplement (PMC8691596; doi:10.1371/journal.pone.0260954), 2021-12-21
Supplement: pone.0260954.s001.pdf [file pone.0260954.s001.pdf]

## **Wilkinson et al: Fc-engineered antibodies with immune effector functions completely abolished**

### **S1 Figure Raw gel images used for preparation of Fig 7.**

Samples were analysed on an 8% E-PAGE 48 polyacrylamide gel (Invitrogen Cat. No. EP04808). SeeBlue Plus2 pre-stained molecular weight standards were applied to the reference lanes. The samples were electrophoresed for 25 min on an E-Base electrophoresis device (Invitrogen Cat. No. EB-M03). The gel was stained with 0.03% Coomassie Brilliant Blue R in 10% acetic acid/40% methanol and destained with 8% acetic acid. Images were captured using an E-gel camera (Invitrogen).

Lane images were cut and pasted into the final order to create the images for Fig 7.

Original Gel 1

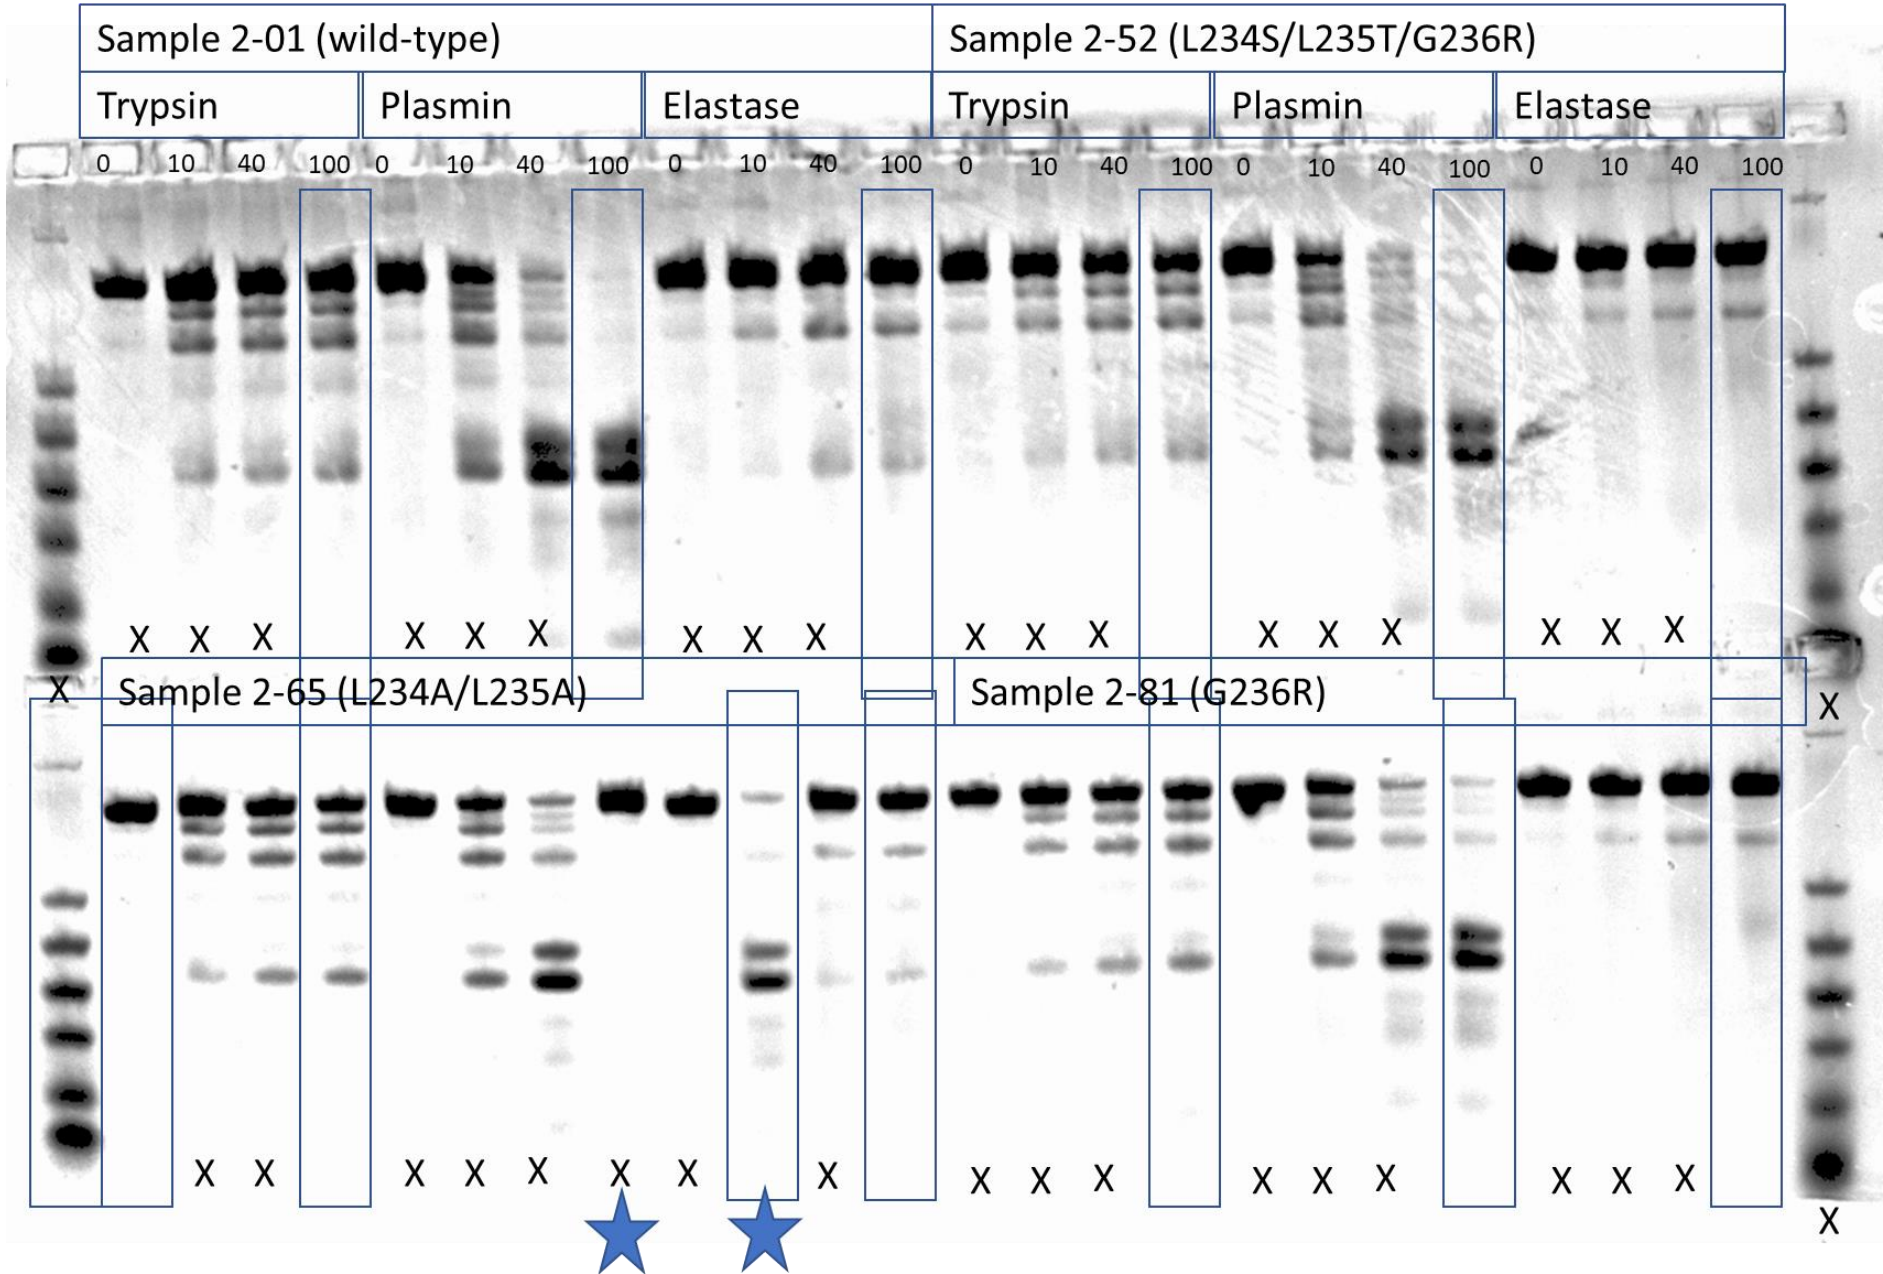

**Original Gel 1 Sample list**

| Lane | Sample  | Enzyme   | Amount | Lane in Fig 7 | Lane | Sample  | Enzyme   | Amount | Lane in Fig 7 |
|------|---------|----------|--------|---------------|------|---------|----------|--------|---------------|
| M    | markers |          |        | X             | M    | markers |          |        | A1            |
| 1    | 2-01    | none     |        | X             | 25   | 2-65    | none     |        | A2            |
| 2    | 2-01    | Trypsin  | 10     | X             | 26   | 2-65    | Trypsin  | 10     | X             |
| 3    | 2-01    | Trypsin  | 40     | X             | 27   | 2-65    | Trypsin  | 40     | X             |
| 4    | 2-01    | Trypsin  | 100    | A3            | 28   | 2-65    | Trypsin  | 100    | A5            |
| 5    | 2-01    | none     |        | X             | 29   | 2-65    | none     |        | X             |
| 6    | 2-01    | Elastase | 10     | X             | 30   | 2-65    | Elastase | 10     | X             |
| 7    | 2-01    | Elastase | 40     | X             | 31   | 2-65    | Elastase | 40     | X             |
| 8    | 2-01    | Elastase | 100    | A11           | 32 * | 2-65    | Plasmin  | 10     | X             |
| 9    | 2-01    | none     |        | X             | 33   | 2-65    | none     |        | X             |
| 10   | 2-01    | Plasmin  | 10     | X             | 34 * | 2-65    | Elastase | 100    | A13           |
| 11   | 2-01    | Plasmin  | 40     | X             | 35   | 2-65    | Plasmin  | 40     | X             |
| 12   | 2-01    | Plasmin  | 100    | A7            | 36   | 2-65    | Plasmin  | 100    | A9            |
| 13   | 2-52    | none     |        | X             | 37   | 2-81    | none     |        | X             |
| 14   | 2-52    | Trypsin  | 10     | X             | 38   | 2-81    | Trypsin  | 10     | X             |
| 15   | 2-52    | Trypsin  | 40     | X             | 39   | 2-81    | Trypsin  | 40     | X             |
| 16   | 2-52    | Trypsin  | 100    | A4            | 40   | 2-81    | Trypsin  | 100    | A6            |
| 17   | 2-52    | none     |        | X             | 41   | 2-81    | none     |        | X             |
| 18   | 2-52    | Elastase | 10     | X             | 42   | 2-81    | Elastase | 10     | X             |
| 19   | 2-52    | Elastase | 40     | X             | 43   | 2-81    | Elastase | 40     | X             |
| 20   | 2-52    | Elastase | 100    | A12           | 44   | 2-81    | Elastase | 100    | A14           |
| 21   | 2-52    | none     |        | X             | 45   | 2-81    | none     |        | X             |
| 22   | 2-52    | Plasmin  | 10     | X             | 46   | 2-81    | Plasmin  | 10     | X             |
| 23   | 2-52    | Plasmin  | 40     | X             | 47   | 2-81    | Plasmin  | 40     | X             |
| 24   | 2-52    | Plasmin  | 100    | A8            | 48   | 2-81    | Plasmin  | 100    | A10           |
| M    | markers |          |        | X             | M    | markers |          |        | X             |

\* the samples originally intended to be loaded in lanes 32 and 34 were switched.

Original Gel 2

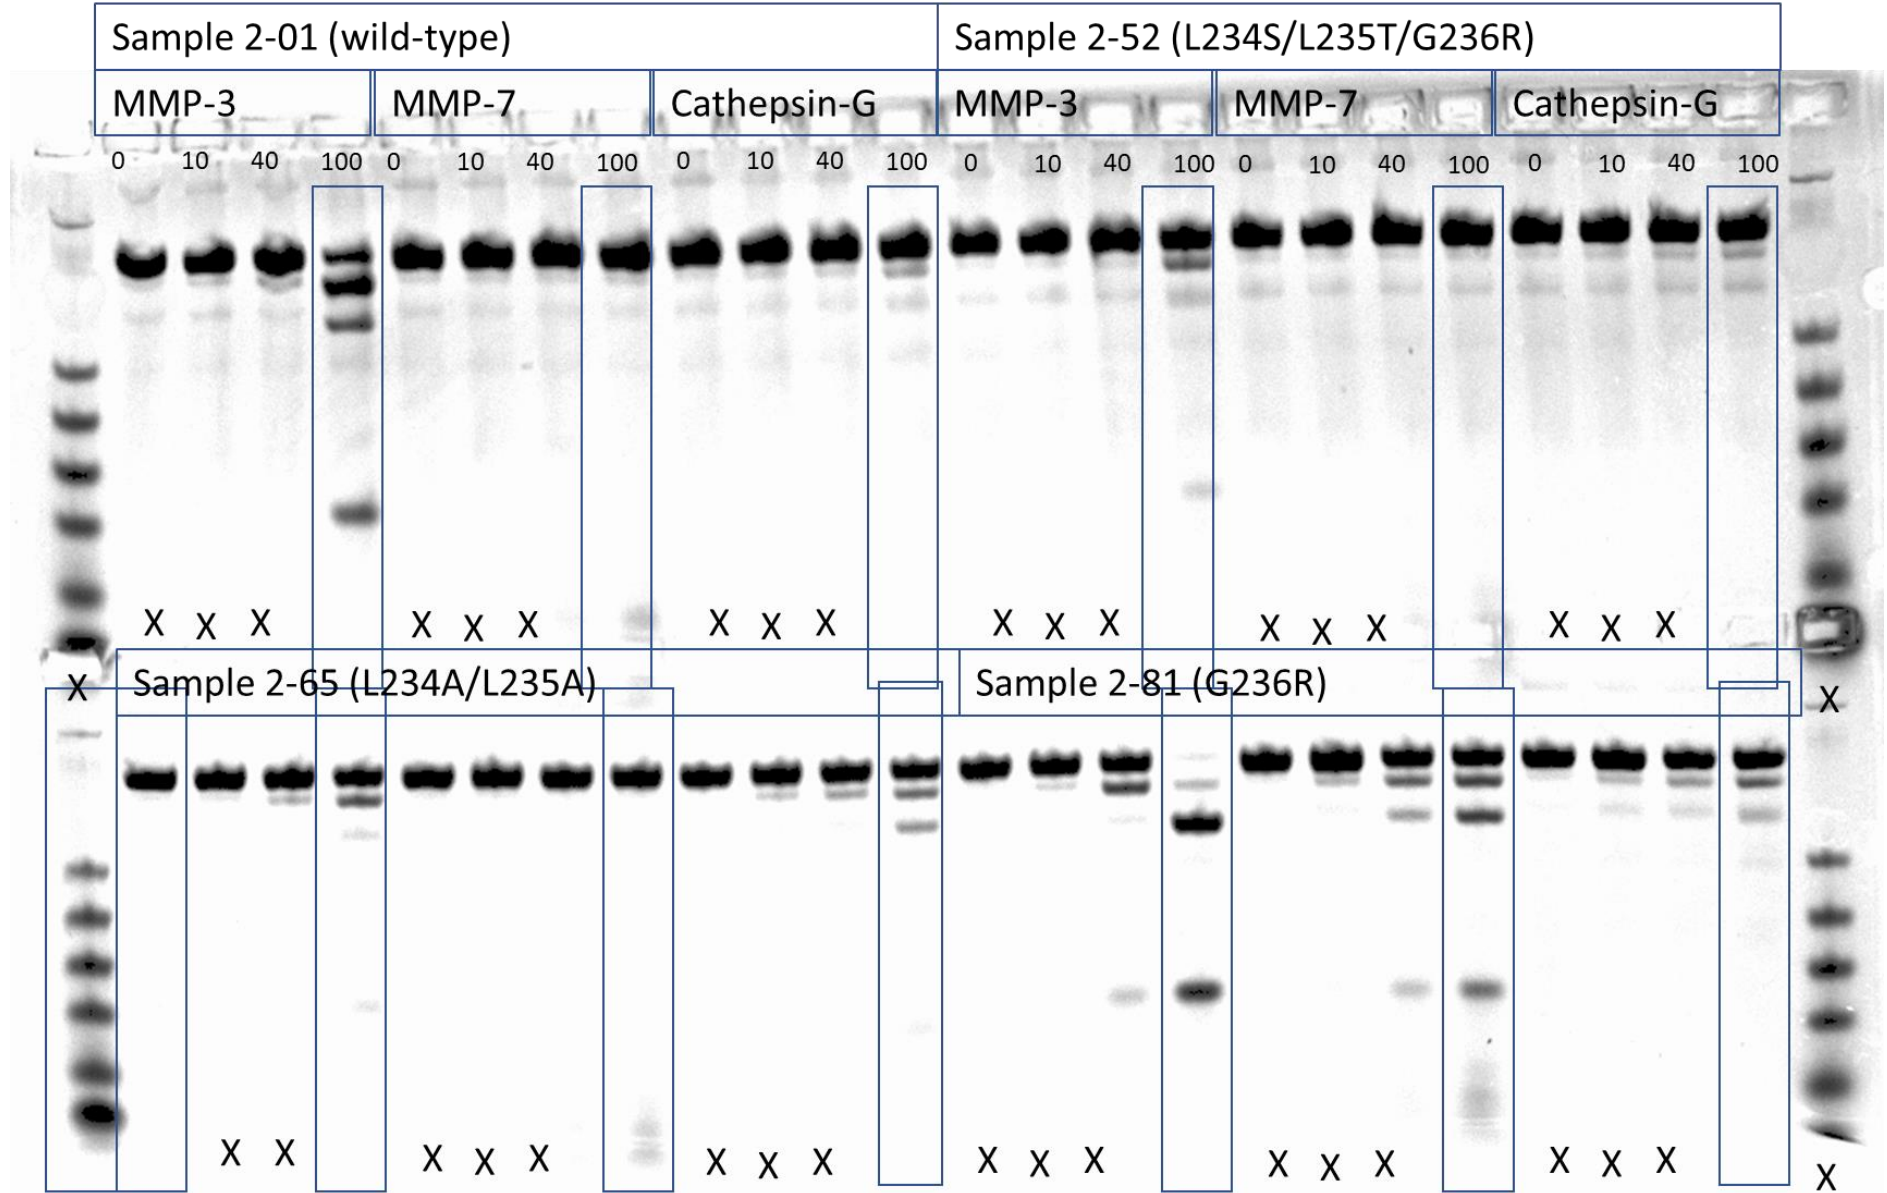

### Original Gel 2 Sample list

| Lane | Sample  | Enzyme      | Amount | Lane in Fig 7 | Lane | Sample  | Enzyme      | Amount | Lane in Fig 7 |
|------|---------|-------------|--------|---------------|------|---------|-------------|--------|---------------|
| M    | markers |             |        | X             | M    | markers |             |        | B1            |
| 1    | 2-01    | none        |        | X             | 25   | 2-65    | none        |        | B2            |
| 2    | 2-01    | MMP-3       | 10     | X             | 26   | 2-65    | MMP-3       | 10     | X             |
| 3    | 2-01    | MMP-3       | 40     | X             | 27   | 2-65    | MMP-3       | 40     | X             |
| 4    | 2-01    | MMP-3       | 100    | B3            | 28   | 2-65    | MMP-3       | 100    | B5            |
| 5    | 2-01    | none        |        | X             | 29   | 2-65    | none        |        | X             |
| 6    | 2-01    | MMP-7       | 10     | X             | 30   | 2-65    | MMP-7       | 10     | X             |
| 7    | 2-01    | MMP-7       | 40     | X             | 31   | 2-65    | MMP-7       | 40     | X             |
| 8    | 2-01    | MMP-7       | 100    | B15           | 32 * | 2-65    | MMP-7       | 10     | B17           |
| 9    | 2-01    | none        |        | X             | 33   | 2-65    | none        |        | X             |
| 10   | 2-01    | Cathepsin-G | 10     | X             | 34 * | 2-65    | Cathepsin-G | 100    | B13           |
| 11   | 2-01    | Cathepsin-G | 40     | X             | 35   | 2-65    | Cathepsin-G | 40     | X             |
| 12   | 2-01    | Cathepsin-G | 100    | B11           | 36   | 2-65    | Cathepsin-G | 100    | B13           |
| 13   | 2-52    | none        |        | X             | 37   | 2-81    | none        |        | X             |
| 14   | 2-52    | MMP-3       | 10     | X             | 38   | 2-81    | MMP-3       | 10     | X             |
| 15   | 2-52    | MMP-3       | 40     | X             | 39   | 2-81    | MMP-3       | 40     | X             |
| 16   | 2-52    | MMP-3       | 100    | B4            | 40   | 2-81    | MMP-3       | 100    | B6            |
| 17   | 2-52    | none        |        | X             | 41   | 2-81    | none        |        | X             |
| 18   | 2-52    | MMP-7       | 10     | X             | 42   | 2-81    | MMP-7       | 10     | X             |
| 19   | 2-52    | MMP-7       | 40     | X             | 43   | 2-81    | MMP-7       | 40     | X             |
| 20   | 2-52    | MMP-7       | 100    | B16           | 44   | 2-81    | MMP-7       | 100    | B18           |
| 21   | 2-52    | none        |        | X             | 45   | 2-81    | none        |        | X             |
| 22   | 2-52    | Cathepsin-G | 10     | X             | 46   | 2-81    | Cathepsin-G | 10     | X             |
| 23   | 2-52    | Cathepsin-G | 40     | X             | 47   | 2-81    | Cathepsin-G | 40     | X             |
| 24   | 2-52    | Cathepsin-G | 100    | B12           | 48   | 2-81    | Cathepsin-G | 100    | B14           |
| M    | markers |             |        | X             | M    | markers |             |        | X             |

Original Gel 3

Sample 2-01 (wild-type)

Sample 2-52

Sample 2-65

Sample 2-81

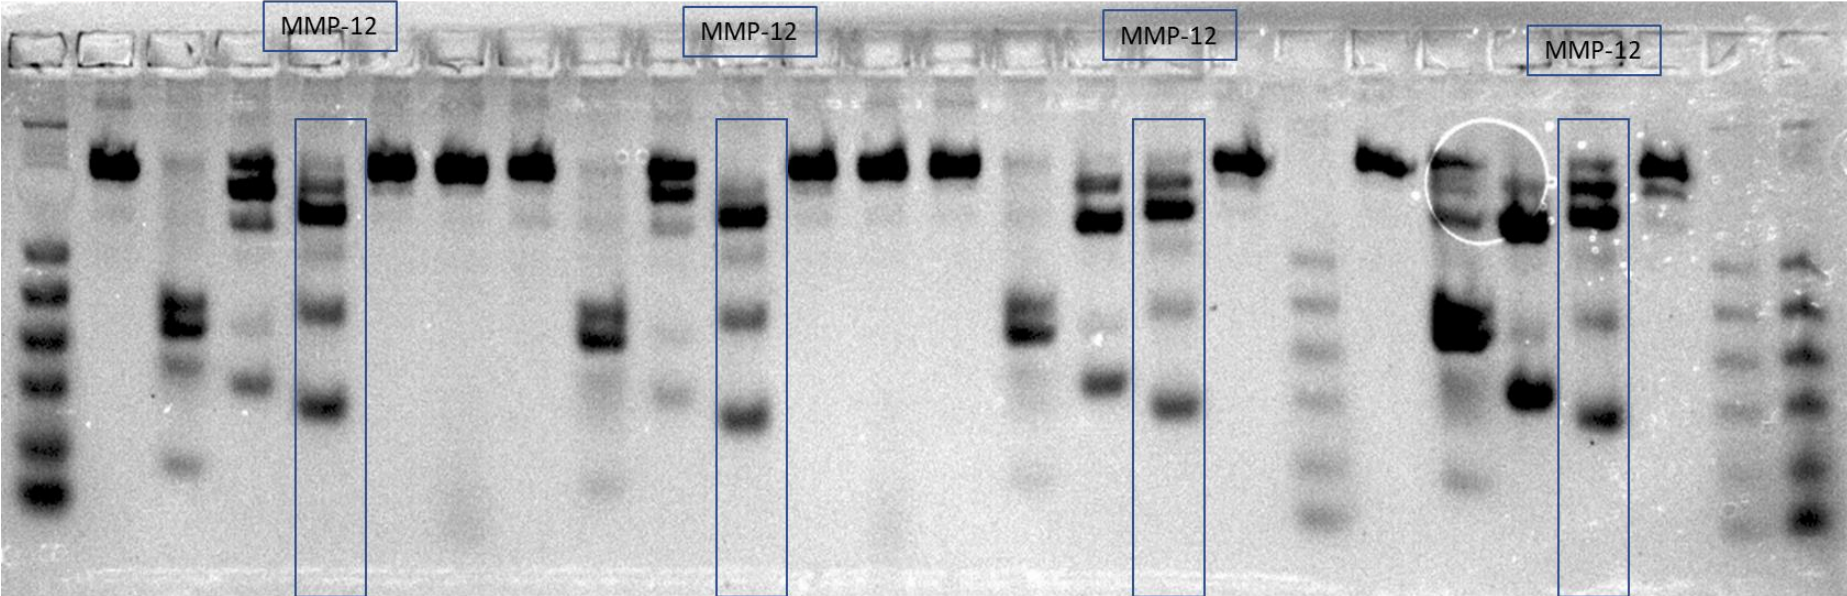

X X X X X X X X X X X X X X X X X X X

### Original Gel 3 Sample list

| Lane | Sample  | Enzyme      | Amount | Lane in Fig 7 |
|------|---------|-------------|--------|---------------|
| M    | markers |             |        | X             |
| 1    | 2-01    | none        |        | X             |
| 2    | 2-01    | Elastase    | 100    | X             |
| 3    | 2-01    | MMP-3       | 100    | X             |
| 4    | 2-01    | MMP-12      | 100    | B7            |
| 5    | 2-01    | Cathepsin-G | 100    | X             |
| 6    | 2-01    | MMP-7       | 100    | X             |
| 7    | 2-01    | none        |        | X             |
| 8    | 2-01    | Elastase    | 100    | X             |
| 9    | 2-01    | MMP-3       | 100    | X             |
| 10   | 2-01    | MMP-12      | 100    | B8            |
| 11   | 2-01    | Cathepsin-G | 100    | X             |
| 12   | 2-01    | MMP-7       | 100    | X             |
| 13   | 2-52    | none        |        | X             |
| 14   | 2-52    | Elastase    | 100    | X             |
| 15   | 2-52    | MMP-3       | 100    | X             |
| 16   | 2-52    | MMP-12      | 100    | B9            |
| 17   | 2-52    | Cathepsin-G | 100    | X             |
| 18   | 2-52    | MMP-7       | 100    | X             |
| 19   | 2-52    | none        |        | X             |
| 20   | 2-52    | Elastase    | 100    | X             |
| 21   | 2-52    | MMP-3       | 100    | X             |
| 22   | 2-52    | MMP-12      | 100    | B10           |
| 23   | 2-52    | Cathepsin-G | 100    | X             |
| 24 * | markers |             |        | X             |
| M    | markers |             |        | X             |

\* there was insufficient test sample, so marker was loaded into lane 24
