# Supplementary material for: Fc-engineered antibodies with immune effector functions completely abolished
Source: PubMed Central journal article supplement (PMC8691596; doi:10.1371/journal.pone.0260954), 2021-12-21
Supplement: pone.0260954.s002.pdf [file pone.0260954.s002.pdf]

**S2 Table: Initial screen of variant antibodies binding to human FcγRI.**

| <b>Sample</b> | <b>Amino acid alterations</b> | <b>Mean binding response (RU)</b> | <b>Exceed cut-off of 21.9 RU</b> |
|---------------|-------------------------------|-----------------------------------|----------------------------------|
| 1-2           | L234A/L235A/G236R             | 30.7                              | Yes                              |
| 1-3           | L234A/L235D/G236R             | 28.0                              | Yes                              |
| 1-4           | L234A/L235E/G236R             | 31.7                              | Yes                              |
| 1-5           | L234A/L235G/G236R             | 27.6                              | Yes                              |
| 1-6           | L234A/L235H/G236R             | 23.0                              | Yes                              |
| 1-7           | L234A/L235I/G236R             | 28.4                              | Yes                              |
| 1-8           | L234A/L235K/G236R             | 34.2                              | Yes                              |
| 1-9           | L234A/G236R                   | 8.0                               |                                  |
| 1-10          | L234A/L235M/G236R             | 27.4                              | Yes                              |
| 1-11          | L234A/L235N/G236R             | 19.5                              |                                  |
| 1-12          | L234A/L235Q/G236R             | 34.3                              | Yes                              |
| 1-13          | L234A/L235R/G236R             | 26.9                              | Yes                              |
| 1-14          | L234A/L235S/G236R             | 32.1                              | Yes                              |
| 1-15          | L234A/L235T/G236R             | 8.0                               |                                  |
| 1-16          | L234A/L235V/G236R             | 25.8                              | Yes                              |
| 1-17          | L234D/L235A/G236R             | 29.6                              | Yes                              |
| 1-18          | L234D/L235D/G236R             | 22.0                              | Yes                              |
| 1-19          | L234D/L235E/G236R             | 22.1                              | Yes                              |
| 1-20          | L234D/L235G/G236R             | 27.3                              | Yes                              |
| 1-22          | L234D/L235I/G236R             | 25.3                              | Yes                              |
| 1-23          | L234D/L235K/G236R             | 20.9                              |                                  |
| 1-24          | L234D/G236R                   | 11.9                              |                                  |
| 1-25          | L234D/L235M/G236R             | 28.4                              | Yes                              |
| 1-26          | L234D/L235N/G236R             | 26.5                              | Yes                              |
| 1-27          | L234D/L235Q/G236R             | 8.3                               |                                  |
| 1-28          | L234D/L235R/G236R             | 47.0                              | Yes                              |
| 1-29          | L234D/L235S/G236R             | 26.3                              | Yes                              |
| 1-30          | L234D/L235T/G236R             | 4.3                               |                                  |
| 1-31          | L234D/L235V/G236R             | 27.2                              | Yes                              |
| 1-32          | L234E/L235A/G236R             | 44.1                              | Yes                              |
| 1-34          | L234E/L235E/G236R             | 30.9                              | Yes                              |
| 1-35          | L234E/L235G/G236R             | 71.2                              | Yes                              |
| 1-36          | L234E/L235H/G236R             | 21.4                              |                                  |
| 1-38          | L234E/L235K/G236R             | 34.1                              | Yes                              |
| 1-39          | L234E/G236R                   | 17.6                              |                                  |
| 1-40          | L234E/L235M/G236R             | 19.9                              |                                  |
| 1-41          | L234E/L235N/G236R             | 19.2                              |                                  |
| 1-42          | L234E/L235Q/G236R             | 33.7                              | Yes                              |
| 1-43          | L234E/L235R/G236R             | 26.7                              | Yes                              |
| 1-44          | L234E/L235S/G236R             | 39.2                              | Yes                              |

| Sample | Amino acid alterations | Mean binding response (RU) | Exceed cut-off of 21.9 RU |
|--------|------------------------|----------------------------|---------------------------|
| 1-45   | L234E/L235T/G236R      | 29.6                       | Yes                       |
| 1-46   | L234E/L235V/G236R      | 18.4                       |                           |
| 1-47   | L234G/L235A/G236R      | 23.0                       | Yes                       |
| 1-48   | L234G/L235D/G236R      | 23.6                       | Yes                       |
| 1-49   | L234G/L235E/G236R      | 31.8                       | Yes                       |
| 1-50   | L234G/L235G/G236R      | 29.5                       | Yes                       |
| 1-51   | L234G/L235H/G236R      | 19.0                       |                           |
| 1-52   | L234G/L235I/G236R      | 29.2                       | Yes                       |
| 1-53   | L234G/L235K/G236R      | 27.4                       | Yes                       |
| 1-54   | L234G/G236R            | 28.5                       | Yes                       |
| 1-55   | L234G/L235M/G236R      | 23.2                       | Yes                       |
| 1-56   | L234G/L235N/G236R      | 26.8                       | Yes                       |
| 1-57   | L234G/L235Q/G236R      | 13.6                       |                           |
| 1-58   | L234G/L235R/G236R      | 29.3                       | Yes                       |
| 1-59   | L234G/L235S/G236R      | 21.8                       |                           |
| 1-60   | L234G/L235T/G236R      | 26.5                       | Yes                       |
| 1-61   | L234G/L235V/G236R      | 32.9                       | Yes                       |
| 1-62   | L234H/L235A/G236R      | 29.4                       | Yes                       |
| 1-63   | L234H/L235D/G236R      | 38.5                       | Yes                       |
| 1-64   | L234H/L235E/G236R      | 22.8                       | Yes                       |
| 1-65   | L234H/L235G/G236R      | 31.6                       | Yes                       |
| 1-66   | L234H/L235H/G236R      | 36.3                       | Yes                       |
| 1-67   | L234H/L235I/G236R      | 2.8                        |                           |
| 1-68   | L234H/L235K/G236R      | 29.2                       | Yes                       |
| 1-69   | L234H/G236R            | 22.9                       | Yes                       |
| 1-70   | L234H/L235M/G236R      | 31.3                       | Yes                       |
| 1-71   | L234H/L235N/G236R      | 24.6                       | Yes                       |
| 1-72   | L234H/L235Q/G236R      | 33.3                       | Yes                       |
| 1-73   | L234H/L235R/G236R      | 35.3                       | Yes                       |
| 1-74   | L234H/L235S/G236R      | 10.9                       |                           |
| 1-75   | L234H/L235T/G236R      | 44.9                       | Yes                       |
| 1-76   | L234H/L235V/G236R      | 25.6                       | Yes                       |
| 1-77   | L234K/L235A/G236R      | 23.0                       | Yes                       |
| 1-78   | L234K/L235D/G236R      | 26.6                       | Yes                       |
| 1-79   | L234K/L235E/G236R      | 29.9                       | Yes                       |
| 1-80   | L234K/L235G/G236R      | 27.4                       | Yes                       |
| 1-81   | L234K/L235H/G236R      | 25.3                       | Yes                       |
| 1-82   | L234K/L235I/G236R      | 30.9                       | Yes                       |
| 1-83   | L234K/L235K/G236R      | 37.6                       | Yes                       |
| 1-84   | L234K/G236R            | 31.2                       | Yes                       |
| 1-85   | L234K/L235M/G236R      | 23.9                       | Yes                       |

| <b>Sample</b> | <b>Amino acid alterations</b> | <b>Mean binding response (RU)</b> | <b>Exceed cut-off of 21.9 RU</b> |
|---------------|-------------------------------|-----------------------------------|----------------------------------|
| 1-86          | L234K/L235N/G236R             | 24.8                              | Yes                              |
| 1-87          | L234K/L235Q/G236R             | 8.4                               |                                  |
| 1-88          | L234K/L235R/G236R             | 13.9                              |                                  |
| 1-89          | L234K/L235S/G236R             | 16.1                              |                                  |
| 1-90          | L234K/L235T/G236R             | 15.8                              |                                  |
| 1-91          | L234K/L235V/G236R             | 12.8                              |                                  |
| 1-92          | L234N/L235A/G236R             | 22.3                              | Yes                              |
| 1-93          | L234N/L235D/G236R             | 13.4                              |                                  |
| 1-94          | L234N/L235E/G236R             | 16.4                              |                                  |
| 1-95          | L234N/L235G/G236R             | 22.1                              | Yes                              |
| 1-96          | L234N/L235H/G236R             | 17.7                              |                                  |
| 1-97          | L234N/L235I/G236R             | 14.1                              |                                  |
| 1-98          | L234N/L235K/G236R             | 25.0                              | Yes                              |
| 1-99          | L234N/G236R                   | 22.3                              | Yes                              |
| 1-100         | L234N/L235M/G236R             | 19.9                              |                                  |
| 1-101         | L234N/L235N/G236R             | 16.9                              |                                  |
| 1-102         | L234N/L235Q/G236R             | 4.5                               |                                  |
| 1-103         | L234N/L235R/G236R             | 30.4                              | Yes                              |
| 1-104         | L234N/L235S/G236R             | 18.4                              |                                  |
| 1-105         | L234N/L235T/G236R             | 8.6                               |                                  |
| 1-106         | L234N/L235V/G236R             | 18.9                              |                                  |
| 1-107         | L234Q/L235A/G236R             | 13.4                              |                                  |
| 1-108         | L234Q/L235D/G236R             | 18.9                              |                                  |
| 1-109         | L234Q/L235E/G236R             | 28.8                              | Yes                              |
| 1-110         | L234Q/L235G/G236R             | 28.1                              | Yes                              |
| 1-111         | L234Q/L235H/G236R             | 10.0                              |                                  |
| 1-112         | L234Q/L235I/G236R             | 34.7                              | Yes                              |
| 1-113         | L234Q/L235K/G236R             | 26.9                              | Yes                              |
| 1-115         | L234Q/L235M/G236R             | 38.4                              | Yes                              |
| 1-116         | L234Q/L235N/G236R             | 26.8                              | Yes                              |
| 1-117         | L234Q/L235Q/G236R             | 16.8                              |                                  |
| 1-118         | L234Q/L235R/G236R             | 20.1                              |                                  |
| 1-119         | L234Q/L235S/G236R             | 11.9                              |                                  |
| 1-120         | L234Q/L235T/G236R             | 20.0                              |                                  |
| 1-121         | L234Q/L235V/G236R             | 20.9                              |                                  |
| 1-122         | L234R/L235A/G236R             | 28.1                              | Yes                              |
| 1-123         | L234R/L235D/G236R             | 11.1                              |                                  |
| 1-124         | L234R/L235E/G236R             | 16.7                              |                                  |
| 1-125         | L234R/L235G/G236R             | 31.9                              | Yes                              |
| 1-126         | L234R/L235H/G236R             | 14.3                              |                                  |
| 1-127         | L234R/L235I/G236R             | 10.7                              |                                  |

| Sample | Amino acid alterations | Mean binding response (RU) | Exceed cut-off of 21.9 RU |
|--------|------------------------|----------------------------|---------------------------|
| 1-128  | L234R/L235K/G236R      | 19.2                       |                           |
| 1-129  | L234R/G236R            | 21.1                       |                           |
| 1-131  | L234R/L235N/G236R      | 10.8                       |                           |
| 1-132  | L234R/L235Q/G236R      | 10.1                       |                           |
| 1-133  | L234R/L235R/G236R      | 17.2                       |                           |
| 1-134  | L234R/L235S/G236R      | 34.0                       | Yes                       |
| 1-136  | L234R/L235V/G236R      | 32.5                       | Yes                       |
| 1-137  | L234S/L235A/G236R      | 29.6                       | Yes                       |
| 1-139  | L234S/L235E/G236R      | 11.6                       |                           |
| 1-140  | L234S/L235G/G236R      | 11.2                       |                           |
| 1-142  | L234S/L235I/G236R      | 12.0                       |                           |
| 1-143  | L234S/L235K/G236R      | 23.8                       | Yes                       |
| 1-145  | L234S/L235M/G236R      | 32.0                       | Yes                       |
| 1-146  | L234S/L235N/G236R      | 22.7                       | Yes                       |
| 1-147  | L234S/L235Q/G236R      | 29.6                       | Yes                       |
| 1-148  | L234S/L235R/G236R      | 11.1                       |                           |
| 1-149  | L234S/L235S/G236R      | 25.6                       | Yes                       |
| 1-150  | L234S/L235T/G236R      | 16.2                       |                           |
| 1-152  | L234T/L235A/G236R      | 11.8                       |                           |
| 1-153  | L234T/L235D/G236R      | 12.2                       |                           |
| 1-154  | L234T/L235E/G236R      | 24.0                       | Yes                       |
| 1-155  | L234T/L235G/G236R      | 26.9                       | Yes                       |
| 1-156  | L234T/L235H/G236R      | 18.9                       |                           |
| 1-157  | L234T/L235I/G236R      | 14.0                       |                           |
| 1-158  | L234T/L235K/G236R      | 6.7                        |                           |
| 1-160  | L234T/L235M/G236R      | 31.6                       | Yes                       |
| 1-161  | L234T/L235N/G236R      | 22.4                       | Yes                       |
| 1-162  | L234T/L235Q/G236R      | 17.0                       |                           |
| 1-163  | L234T/L235R/G236R      | 13.6                       |                           |
| 1-164  | L234T/L235S/G236R      | 25.4                       | Yes                       |
| 1-167  | L234A/L235A (LALA)     | 65.0                       | Yes                       |

Samples of undiluted culture supernatants were injected over immobilised FcγRI for 1 min at 30 μL/min and allowed to disassociate for 2 min. The whole experiment was repeated three times. Due to the relatively crude nature of the samples, some sensorgrams were unsatisfactory and were eliminated from analysis. The mean and standard deviation of the specific binding response was calculated for each sample. The mean of all standard deviations was 6.7 RU. Sample 1-119 (L234Q/L235S/G236R) was taken as a representative variant which was effectively silenced. It gave a mean response of 11.9 RU. A cut-off of 21.9 RU was calculated as equal to the mean response of this representative variant plus 1.645 times the mean standard deviation of the samples. Samples giving a response above this cut-off were deemed to give significantly greater binding to FcγRI compared with the representative sample 1-119.
