# Supplementary material for: Fc-engineered antibodies with immune effector functions completely abolished
Source: PubMed Central journal article supplement (PMC8691596; doi:10.1371/journal.pone.0260954), 2021-12-21
Supplement: pone.0260954.s003.pdf [file pone.0260954.s003.pdf]

S3 Table: Individual results for Table 2: Binding responses of CD20, CD3 and CD52 antibodies binding to Fc gamma receptors.

| Sample                        | Specificity | Amino acid alterations and sample description | human FcγRI |         |        |       | human FcγRIIa |       |       |     | human FcγRIIb |       |      |     | human FcγRIIIa |       |       |      | human FcγRIIIb |       |       |      | mouse FcγRI |       |       |     | rat FcγRI |        |        |      |       |       |       |      |
|-------------------------------|-------------|-----------------------------------------------|-------------|---------|--------|-------|---------------|-------|-------|-----|---------------|-------|------|-----|----------------|-------|-------|------|----------------|-------|-------|------|-------------|-------|-------|-----|-----------|--------|--------|------|-------|-------|-------|------|
|                               |             |                                               | Rep 1       | Rep 2   | Mean   | SD    | Rep 1         | Rep 2 | Mean  | SD  | Rep 1         | Rep 2 | Mean | SD  | Rep 1          | Rep 2 | Mean  | SD   | Rep 1          | Rep 2 | Mean  | SD   | Rep 1       | Rep 2 | Mean  | SD  | Rep 1     | Rep 2  | Mean   | SD   |       |       |       |      |
|                               |             |                                               | Rep 1       | Rep 2   | Mean   | SD    | Rep 1         | Rep 2 | Mean  | SD  | Rep 1         | Rep 2 | Mean | SD  | Rep 1          | Rep 2 | Mean  | SD   | Rep 1          | Rep 2 | Mean  | SD   | Rep 1       | Rep 2 | Mean  | SD  | Rep 1     | Rep 2  | Mean   | SD   |       |       |       |      |
| PBS                           |             |                                               | -0.4        | 0.8     | 0.2    | 0.9   | -8.4          | -2.1  | -5.2  | 4.4 | -7.4          | -1.2  | -4.3 | 4.4 | 0.3            | -6.7  | -3.2  | 4.9  | -4.6           | -1.6  | -3.1  | 2.1  | -4.7        | 5*    | -4.7  | na  | 0.1       | 265.7* | 0.1    | na   | 0.3   | 44.5* | 0.3   | na   |
| PBS                           |             |                                               | 1.1         | 1.3     | 1.2    | 0.2   | 7.0           | 0.3   | 3.7   | 4.7 | 6.0           | 1.7   | 3.9  | 3.1 | 0.4            | 0.7   | 0.5   | 0.2  | 4.1            | 0.7   | 2.4   | 2.4  | 3.9         | 0.0   | 1.9   | 2.7 | 0.1       | 2.8    | 1.5    | 1.9  | 1.6   | -3.2  | -0.8  | 3.3  |
| PBS                           |             |                                               | -0.9        | 0.9     | 0.0    | 1.2   | 1.4           | -0.7  | 0.3   | 1.5 | 1.4           | 0.2   | 0.8  | 0.8 | -0.8           | -0.4  | -0.6  | 0.3  | 0.4            | -0.2  | 0.1   | 0.4  | 0.9         | -0.1  | 0.4   | 0.7 | -0.3      | -2.6   | -1.4   | 1.6  | -1.9  | -0.1  | -1.0  | 1.3  |
| PBS                           |             |                                               | 5.3         | -117.1* | 5.3    | na    | 1.1           | -2.0  | -0.4  | 2.2 | 1.3           | -4.4  | -1.5 | 4.0 | -2.4           | 1.1   | -0.6  | 2.4  | 0.1            | -3.0  | -1.5  | 2.2  | 0.4         | -4.0  | -1.8  | 3.1 | 0.0       | 3.4    | 1.7    | 2.4  | -0.3  | 1.2   | 0.4   | 1.1  |
| PBS                           |             |                                               | 3.5         | -1.8    | 0.9    | 3.8   | 0.9           | -0.4  | 0.3   | 0.9 | 1.5           | -1.3  | 0.1  | 2.0 | -2.1           | -0.7  | -1.4  | 1.0  | 1.6            | -0.5  | 0.6   | 1.5  | 0.6         | -0.8  | -0.1  | 1.0 | 8.3       | -0.8   | 3.8    | 6.5  | 0.8   | -1.1  | -0.1  | 1.4  |
| PBS                           |             |                                               | 0.9         | 3.2     | 2.0    | 1.6   | 7.8           | 1.2   | 4.5   | 4.6 | 8.9           | 1.3   | 5.1  | 5.4 | -4.8           | nd    | -4.8  | na   | 7.6            | 1.1   | 4.4   | 4.6  | 8.4         | 1.1   | 4.8   | 5.1 | 0.1       | nd     | 0.1    | na   | -2.8  | nd    | -2.8  | na   |
| PBS                           |             |                                               | 4.8         | -1.4    | 1.7    | 4.4   | 1.5           | -0.8  | 0.4   | 1.6 | 2.1           | nd    | 2.1  | na  | -5.3           | nd    | -5.3  | na   | 2.4            | -0.6  | 0.9   | 2.1  | 1.2         | -0.4  | 0.4   | 1.1 | -1.0      | nd     | -1.0   | na   | -1.5  | nd    | -1.5  | na   |
| Mean of PBS negative controls |             |                                               | 1.3         |         |        |       | 0.5           |       |       |     | 0.8           |       |      |     | 0.5            |       |       |      | 0.5            |       |       |      | 0.9         |       |       |     | -0.6      |        |        |      |       |       |       |      |
| SD                            |             |                                               | 2.3         |         |        |       | 3.9           |       |       |     | 4.1           |       |      |     | 2.6            |       |       |      | 3.0            |       |       |      | 3.0         |       |       |     | 1.6       |        |        |      |       |       |       |      |
| Cut point = Mean+1.645*SD     |             |                                               | 5.1         |         |        |       | 6.8           |       |       |     | 7.5           |       |      |     | 2.5            |       |       |      | 5.4            |       |       |      | 5.8         |       |       |     | 2.0       |        |        |      |       |       |       |      |
| 2-1                           | CD20        | wild type reference                           | 2487.8      | 2237.8  | 2362.8 | 176.8 | 144.4         | 131.4 | 137.9 | 9.2 | 53.4          | 50.4  | 51.9 | 2.2 | 652.8          | 637.8 | 645.3 | 10.7 | 390.4          | 357.5 | 373.9 | 23.3 | 205.5       | 208.2 | 206.9 | 1.9 | 1981.1    | 1889.4 | 1935.3 | 64.8 | 815.7 | 761.8 | 788.7 | 38.2 |
| 2-19                          | CD20        | L234G/L235S/G236R                             | -1.2        | -1.8    | -1.5   | 0.4   | 5.0           | -0.8  | 2.1   | 4.1 | 2.7           | -2.8  | -0.1 | 3.9 | -0.4           | 0.8   | 0.2   | 0.8  | 3.3            | -1.4  | 1.0   | 3.3  | 0.0         | -3.1  | -1.6  | 2.2 | -3.2      | -1.7   | -2.5   | 1.1  | -7.2  | -1.0  | -4.1  | 4.4  |
| 2-52                          | CD20        | L234S/L235T/G236R                             | -2.2        | -0.5    | -1.3   | 1.2   | 6.1           | -0.9  | 2.6   | 4.9 | 3.7           | -2.7  | 0.5  | 4.5 | -4.6           | -3.4  | -4.0  | 0.9  | 5.0            | -1.1  | 1.9   | 4.3  | 11.0*       | -3.0  | -3.0  | na  | -1.8      | -6.6   | -4.2   | 3.3  | 0.0   | -3.8  | -1.9  | 2.7  |
| 2-53                          | CD20        | L234S/L235V/G236R                             | -2.7        | -0.5    | -1.6   | 1.5   | 2.5           | -1.9  | 0.3   | 3.1 | 1.8           | -3.5  | -0.8 | 3.7 | -0.3           | 0.7   | 0.2   | 0.7  | 2.7            | -2.8  | 0.0   | 3.9  | 4.7         | -3.6  | 0.6   | 5.9 | 1.3       | -1.7   | -0.2   | 2.2  | 0.1   | -1.2  | -0.5  | 0.9  |
| 2-60                          | CD20        | L234T/L235Q/G236R                             | -2.4        | -1.4    | -1.9   | 0.7   | 2.4           | -2.1  | 0.2   | 3.2 | 1.6           | -3.8  | -1.1 | 3.8 | -2.0           | -1.7  | -1.8  | 0.2  | 1.4            | -2.5  | -0.5  | 2.8  | 1.3         | -4.2  | -1.5  | 3.9 | -2.2      | -3.7   | -3.0   | 1.1  | -1.2  | -3.0  | -2.1  | 1.3  |
| 2-63                          | CD20        | L234T/L235T/G236R                             | -3.4        | -1.9    | -2.7   | 1.1   | 4.4           | -0.7  | 1.9   | 3.6 | 3.5           | -2.3  | 0.6  | 4.1 | -0.3           | 3.2   | 1.4   | 2.5  | 4.5            | -1.3  | 1.6   | 4.1  | 2.2         | -2.4  | -0.1  | 3.3 | -1.1      | 0.0    | -0.6   | 0.8  | -0.4  | -0.5  | -0.4  | 0.0  |
| 2-65                          | CD20        | L234A/L235A (LALA)                            | 606.3       | 501.4   | 553.9  | 74.2  | 14.5          | 11.6  | 13.1  | 2.0 | 5.8           | 9.1   | 7.5  | 2.4 | 73.5           | 53.1  | 63.3  | 14.4 | 29.4           | 28.6  | 29.0  | 0.5  | 9.2         | 13.1  | 11.2  | 2.8 | -10.9     | -13.6  | -12.3  | 1.9  | -7.8  | -2.7  | -5.3  | 3.6  |
| 2-66                          | CD20        | L234A/L235A/P329G (LALAPG)                    | 48.1        | 14.7*   | 48.1   | na    | 2.6           | 3.4   | 3.0   | 0.6 | 6.4           | 1.8   | 4.1  | 3.3 | 0.7            | 1.5   | 1.1   | 0.6  | 6.3            | 3.1   | 4.7   | 2.3  | 9.3         | 0.8   | 5.1   | 6.0 | 2.2       | 2.2    | 2.2    | 0.0  | 2.6   | -1.4  | 0.6   | 2.8  |
| 2-67                          | CD20        | N297Q (aglycosyl)                             | 499.8       | 358.2*  | 499.8  | na    | 6.3           | 3.9   | 5.1   | 1.6 | 5.4           | -0.6  | 2.4  | 4.3 | 1.1            | 0.9   | 1.0   | 0.1  | 3.4            | 1.5   | 2.4   | 1.3  | 6.8         | -1.4  | 2.7   | 5.7 | 67.3      | 53.8   | 60.5   | 9.5  | 579.8 | 540.9 | 560.3 | 27.5 |
| 3-1                           | CD3         | wild type reference                           | 2500.2      | 2310.3  | 2405.3 | 134.3 | 125.4         | 127.4 | 126.4 | 1.4 | 42.5          | 44.9  | 43.7 | 1.6 | 699.9          | 679.0 | 689.5 | 14.8 | 266.9          | 252.8 | 259.9 | 9.9  | 142.1       | 147.2 | 144.6 | 3.6 | 2049.0    | 1939.0 | 1994.0 | 77.8 | 821.5 | 756.7 | 789.1 | 45.8 |
| 3-19                          | CD3         | L234G/L235S/G236R                             | -2.9        | -7.6    | -5.2   | 3.3   | -5.1          | -4.6  | -4.8  | 0.3 | -5.4          | -4.7  | -5.1 | 0.5 | -8.9           | -12.7 | -10.8 | 2.7  | -5.1           | -4.3  | -4.7  | 0.6  | -6.5        | -6.3  | -6.4  | 0.1 | -3.1      | -4.9   | -4.0   | 1.3  | -2.4  | -4.4  | -3.4  | 1.4  |
| 3-52                          | CD3         | L234S/L235T/G236R                             | -7.4        | -3.1    | -5.2   | 3.0   | 2.8           | 0.0   | 1.4   | 2.0 | 7.2           | 0.6   | 3.9  | 4.7 | -5.6           | -9.2  | -7.4  | 2.5  | 6.1            | 0.5   | 3.3   | 3.9  | 8.2         | 1.2   | 4.7   | 4.9 | -5.0      | -5.9   | -5.4   | 0.7  | -3.6  | -5.0  | -4.3  | 1.0  |
| 3-53                          | CD3         | L234S/L235V/G236R                             | -5.7        | -5.0    | -5.4   | 0.4   | -4.4          | -2.4  | -3.4  | 1.4 | -5.0          | -3.3  | -4.2 | 1.2 | -7.6           | -10.6 | -9.1  | 2.2  | -4.0           | -2.8  | -3.4  | 0.9  | -5.5        | -4.1  | -4.8  | 1.0 | -5.1      | -7.3   | -6.2   | 1.6  | -1.7  | -6.3  | -4.0  | 3.2  |
| 3-60                          | CD3         | L234T/L235Q/G236R                             | -3.5        | -2.9    | -3.2   | 0.4   | 1.9           | -2.3  | -0.2  | 3.0 | -0.7          | -4.9  | -2.8 | 3.0 | -5.8           | -9.5  | -7.6  | 2.7  | -0.1           | -1.8  | -0.9  | 1.2  | -2.3        | -3.7  | -3.0  | 0.9 | -3.0      | -5.3   | -4.1   | 1.6  | 0.3   | -3.9  | -1.8  | 3.0  |
| 3-63                          | CD3         | L234T/L235T/G236R                             | -2.8        | -3.5    | -3.1   | 0.4   | -2.2          | -3.3  | -2.8  | 0.8 | -2.2          | -4.3  | -3.3 | 1.5 | -6.4           | -9.2  | -7.8  | 2.0  | -0.5           | -3.4  | -2.0  | 2.1  | -3.6        | -5.1  | -4.4  | 1.0 | -5.5      | -4.6   | -5.1   | 0.6  | -2.7  | -3.9  | -3.3  | 0.9  |
| 3-65                          | CD3         | L234A/L235A (LALA)                            | 540.8       | 528.3   | 534.5  | 8.9   | 9.4           | 2.1   | 5.8   | 5.1 | 2.5           | -3.0  | -0.3 | 3.9 | 70.6           | 63.8  | 67.2  | 4.8  | 17.4           | 12.3* | 17.4  | na   | 2.6         | 4.7   | 3.7   | 1.5 | -0.7      | -2.4   | -1.6   | 1.2  | -3.0  | -5.3  | -4.1  | 1.6  |
| 3-66                          | CD3         | L234A/L235A/P329G (LALAPG)                    | 44.2        | 34.7    | 39.4   | 6.8   | -4.4          | -5.6  | -5.0  | 0.8 | -4.3          | -6.9  | -5.6 | 1.8 | -7.8           | -10.3 | -9.1  | 1.7  | -1.9           | -5.7  | -3.8  | 2.7  | 6.1         | -4.0  | 1.1   | 7.2 | -5.2      | -7.6   | -6.4   | 1.7  | -3.8  | -6.8  | -5.3  | 2.1  |
| 3-67                          | CD3         | N297Q (aglycosyl)                             | 501.9       | 502.1   | 502.0  | 0.1   | 5.9           | -2.6  | 1.7   | 6.0 | -1.8          | -7.5  | -4.7 | 4.0 | -10.6          | -11.5 | -11.1 | 0.7  | -0.7           | -5.9  | -3.3  | 3.7  | 0.9         | -6.5  | -2.8  | 5.2 | 47.4      | 42.7   | 45.0   | 3.3  | 487.0 | 471.0 | 479.0 | 11.3 |
| 4-1                           | CD52        | wild type reference                           | 2267.5      | 1951.9  | 2109.7 | 223.2 | 129.0         | 125.6 | 127.3 | 2.4 | 46.3          | 40.5  | 43.4 | 4.1 | 526.4          | 406.2 | 466.3 | 85.0 | 315.9          | 276.4 | 296.1 | 27.9 | 176.6       | 174.5 | 175.5 | 1.5 | 1675.7    | 1565.1 | 1620.4 | 78.1 | 608.5 | 577.9 | 593.2 | 21.7 |
| 4-19                          | CD52        | L234G/L235S/G236R                             | -2.3        | -4.7    | -3.5   | 1.7   | -3.4          | -3.6  | -3.5  | 0.2 | -3.0          | -8.0  | -5.5 | 3.5 | -4.3           | -1.0  | -2.6  | 2.3  | -3.5           | -5.0  | -4.2  | 1.0  | -3.5        | -6.1  | -4.8  | 1.9 | -1.6      | -3.3   | -2.4   | 1.2  | -0.6  | -2.9  | -1.7  | 1.6  |
| 4-52                          | CD52        | L234S/L235T/G236R                             | -4.0        | -6.1    | -5.1   | 1.5   | -1.0          | -5.1  | -3.1  | 2.9 | -1.7          | -7.1  | -4.4 | 3.9 | -5.0           | -2.7  | -3.8  | 1.7  | -1.1           | -5.5  | -3.3  | 3.2  | -1.8        | -6.7  | -4.3  | 3.4 | -2.4      | -5.1   | -3.7   | 1.9  | -1.4  | -3.6  | -2.5  | 1.5  |
| 4-53                          | CD52        | L234S/L235V/G236R                             | -21.6       | -18.9   | -20.3  | 2.0   | -2.0          | -6.5  | -4.2  | 3.1 | 6.1           | -1.2  | 2.4  | 5.2 | -3.9           | 0.4   | -1.8  | 3.0  | 5.7            | -1.3  | 2.2   | 4.9  | 5.2         | 0.0   | 2.6   | 3.7 | -2.6      | -2.9   | -2.8   | 0.2  | -2.6  | -1.9  | -2.2  | 0.4  |
| 4-60                          | CD52        | L234T/L235Q/G236R                             | -11.9       | -9.4    | -10.6  | 1.8   | -1.9          | -2.5  | -2.2  | 0.4 | 3.3           | -0.7  | 1.3  | 2.9 | -1.8           | -0.4  | -1.1  | 0.9  | 2.4            | -1.1  | 0.7   | 2.5  | 2.6         | -1.9  | 0.4   | 3.2 | 2.7       | -3.3   | -0.3   | 4.2  | 3.8   | -2.0  | 0.9   | 4.1  |
| 4-63                          | CD52        | L234T/L235T/G236R                             | -22.7       | -18.6   | -20.7  | 2.9   | -10.5         | -6.9  | -8.7  | 2.6 | 0.2           | -0.3  | -0.1 | 0.3 | -3.3           | 1.1   | -1.1  | 3.1  | -2.5*          | -1.3  | -1.3  | na   | 13.7*       | 0.8   | 0.8   | na  | -3.9      | -3.0   | -3.4   | 0.7  | -3.3  | -3.1  | -3.2  | 0.2  |
| 4-65                          | CD52        | L234A/L235A (LALA)                            | 483.5       | 419.4   | 451.5  | 45.3  | 7.2           | 4.4   | 5.8   | 1.9 | 2.3           | 2.3   | 2.3  | 0.0 | 69.3           | 58.3  | 63.8  | 7.8  | 17.1           | 16.9  | 17.0  | 0.2  | 7.1         | 4.6   | 5.9   | 1.8 | -0.2      | 4.4    | 2.1    | 3.2  | -3.0  | 1.9   | -0.6  | 3.4  |
| 4-66                          | CD52        | L234A/L235A/P329G (LALAPG)                    | 35.7        | 31.8    | 33.7   | 2.7   | 1.0           | 1.4   | 1.2   | 0.3 | 2.5           | 3.3   | 2.9  | 0.6 | 3.0            | nd    | -3.0  | na   | 2.7            | 3.2   | 3.0   | 0.3  | 4.5         | 2.3   | 3.4   | 1.5 | -2.5      | 1.7    | -0.4   | 3.0  | -1.7  | 1.6   | -0.1  | 2.4  |
| 4-67                          | CD52        | N297Q (aglycosyl)                             | 458.3       | 402.9   | 430.6  | 39.2  | 0.2           | 5.9   | 3.1   | 4.0 | 0.7           | 5.0   | 2.9  | 3.0 | -3.4           | -7.5  | -5.5  | 2.9  | 0.0            | 5.6   | 2.8   | 4.0  | 0.9         | 4.5   | 2.7   | 2.5 | 54.1      | 48.8   | 51.5   | 3.8  | 506.7 | 470.4 | 488.5 | 25.7 |

nd = sample not analysed  
na = not applicable  
\* = point dropped due to unsatisfactory sensorgram (e.g. air bubble)  
highlight = result above cut point
