# Supplementary material for: Fc-engineered antibodies with immune effector functions completely abolished
Source: PubMed Central journal article supplement (PMC8691596; doi:10.1371/journal.pone.0260954), 2021-12-21
Supplement: pone.0260954.s004.pdf [file pone.0260954.s004.pdf]

S4 Table: Mean and SD of absolute absorbance responses for Table 4: Mean normalised absorbance of antibodies binding human C1q

| Target antigen | Amino acid alterations and sample description | Expt 1  | Expt 1  | Expt 2  | Expt 2  | Expt 3  | Expt 3  | Expt 3  | Expt 3  |
|----------------|-----------------------------------------------|---------|---------|---------|---------|---------|---------|---------|---------|
|                |                                               | Plate 1 | Plate 1 | Plate 2 | Plate 2 | Plate 3 | Plate 3 | Plate 4 | Plate 4 |
|                |                                               | Mean    | SD      | Mean    | SD      | Mean    | SD      | Mean    | SD      |
|                | PBS                                           | 0.050   | 0.020   | 0.073   | 0.037   | 0.111   | 0.017   | 0.070   | 0.023   |
|                | PBS                                           | nd      | nd      | nd      | nd      | 0.081   | 0.007   | 0.061   | 0.022   |
|                | PBS                                           | nd      | nd      | nd      | nd      | 0.092   | 0.009   | 0.041   | 0.003   |
| CD20           | wild type reference                           | 2.484   | 0.208   | 2.773   | 0.131   | 2.187   | 0.157   | 2.237   | 0.152   |
| CD20           | L234G/L235S/G236R                             | 0.085   | 0.009   | 0.020   | 0.011   | 0.106   | 0.016   | 0.077   | 0.004   |
| CD20           | L234S/L235T/G236R                             | 0.065   | 0.003   | 0.029   | 0.014   | 0.080   | 0.019   | 0.078   | 0.005   |
| CD20           | L234S/L235V/G236R                             | 0.080   | 0.011   | 0.064   | 0.020   | 0.089   | 0.026   | 0.090   | 0.022   |
| CD20           | L234T/L235Q/G236R                             | 0.066   | 0.010   | 0.031   | 0.027   | 0.086   | 0.013   | 0.068   | 0.020   |
| CD20           | L234T/L235T/G236R                             | 0.064   | 0.003   | 0.073   | 0.049   | 0.088   | 0.015   | 0.065   | 0.012   |
| CD20           | L234A/L235A (LALA)                            | nd      | nd      | nd      | nd      | 0.080   | 0.026   | 0.075   | 0.002   |
| CD20           | L234A/L235A/P329G (LALAPG reference)          | 0.086   | 0.017   | 0.090   | 0.059   | 0.111   | 0.006   | 0.092   | 0.009   |
| CD20           | N297Q (aglycosyl)                             | nd      | nd      | nd      | nd      | 0.078   | 0.007   | 0.074   | 0.004   |
|                |                                               | Expt 4  | Expt 4  | Expt 4  | Expt 4  | Expt 5  | Expt 5  | Expt 5  | Expt 5  |
|                |                                               | Plate 5 | Plate 5 | Plate 6 | Plate 6 | Plate 7 | Plate 7 | Plate 8 | Plate 8 |
|                |                                               | Mean    | SD      | Mean    | SD      | Mean    | SD      | Mean    | SD      |
|                | PBS                                           | 0.050   | 0.002   | 0.050   | 0.002   | 0.038   | 0.002   | 0.039   | 0.002   |
|                | PBS                                           | 0.053   | 0.005   | 0.048   | 0.003   | 0.043   | 0.003   | 0.047   | 0.002   |
|                | PBS                                           | 0.059   | 0.009   | 0.049   | 0.000   | 0.055   | 0.012   | 0.050   | 0.006   |
|                | PBS                                           | 0.051   | 0.002   | 0.052   | 0.003   | 0.049   | 0.004   | 0.049   | 0.008   |
|                | PBS                                           | 0.053   | 0.003   | 0.054   | 0.007   | 0.049   | 0.009   | 0.054   | 0.003   |
| CD3            | wild type reference                           | 0.547   | 0.027   | 0.991   | 0.080   | 0.409   | 0.026   | 0.456   | 0.049   |
| CD3            | L234G/L235S/G236R                             | 0.050   | 0.002   | 0.055   | 0.003   | 0.046   | 0.001   | 0.052   | 0.002   |
| CD3            | L234S/L235T/G236R                             | 0.046   | 0.001   | 0.049   | 0.002   | 0.041   | 0.005   | 0.051   | 0.003   |
| CD3            | L234S/L235V/G236R                             | 0.047   | 0.002   | 0.047   | 0.000   | 0.039   | 0.001   | 0.044   | 0.002   |
| CD3            | L234T/L235Q/G236R                             | 0.046   | 0.001   | 0.048   | 0.003   | 0.043   | 0.003   | 0.047   | 0.003   |
| CD3            | L234T/L235T/G236R                             | 0.047   | 0.001   | 0.048   | 0.001   | 0.047   | 0.008   | 0.049   | 0.002   |
| CD3            | L234A/L235A (LALA)                            | 0.052   | 0.002   | 0.054   | 0.001   | 0.051   | 0.013   | 0.050   | 0.002   |
| CD3            | L234A/L235A/P329G (LALAPG reference)          | 0.054   | 0.006   | 0.049   | 0.002   | 0.041   | 0.003   | 0.048   | 0.003   |
| CD3            | N297Q (aglycosyl)                             | 0.053   | 0.003   | 0.051   | 0.001   | 0.050   | 0.011   | 0.051   | 0.003   |
| CD52           | wild type reference                           | 1.166   | 0.075   | 1.680   | 0.086   | 0.624   | 0.098   | 0.674   | 0.092   |
| CD52           | L234G/L235S/G236R                             | 0.050   | 0.003   | 0.057   | 0.002   | 0.056   | 0.001   | 0.056   | 0.001   |
| CD52           | L234S/L235T/G236R                             | 0.049   | 0.001   | 0.055   | 0.002   | 0.051   | 0.001   | 0.056   | 0.004   |
| CD52           | L234S/L235V/G236R                             | 0.053   | 0.005   | 0.061   | 0.003   | 0.058   | 0.007   | 0.060   | 0.009   |
| CD52           | L234T/L235Q/G236R                             | 0.052   | 0.002   | 0.059   | 0.002   | 0.049   | 0.002   | 0.055   | 0.005   |
| CD52           | L234T/L235T/G236R                             | 0.055   | 0.001   | 0.060   | 0.003   | 0.059   | 0.007   | 0.057   | 0.003   |
| CD52           | L234A/L235A (LALA)                            | 0.058   | 0.001   | 0.066   | 0.002   | 0.054   | 0.003   | 0.061   | 0.002   |
| CD52           | L234A/L235A/P329G (LALAPG reference)          | 0.053   | 0.002   | 0.064   | 0.005   | 0.059   | 0.001   | 0.056   | 0.003   |
| CD52           | N297Q (aglycosyl)                             | 0.049   | 0.002   | 0.053   | 0.002   | 0.037   | 0.001   | 0.050   | 0.002   |

means and standard deviations are each of three replicates  
nd = sample not done
