# Supplementary material for: Fc-engineered antibodies with immune effector functions completely abolished
Source: PubMed Central journal article supplement (PMC8691596; doi:10.1371/journal.pone.0260954), 2021-12-21
Supplement: pone.0260954.s005.pdf [file pone.0260954.s005.pdf]

**S5 Table: Individual results for Table 5: Mean normalised binding of antibodies to FcRn**

| Sample | Specificity | Amino acid alterations and sample description | human | human | human | human |
|--------|-------------|-----------------------------------------------|-------|-------|-------|-------|
|        |             |                                               | FcRn  | FcRn  | FcRn  | FcRn  |
|        |             |                                               | Rep 1 | Rep 2 | Mean  | SD    |
| PBS    |             |                                               | 0.0   | 0.2   | 0.1   | 0.1   |
| 2-1    | CD20        | wild type reference                           | 100.0 | 100.0 | 100.0 | na    |
| 2-19   | CD20        | L234G/L235S/G236R                             | 106.1 | 97.1  | 101.6 | 6.3   |
| 2-52   | CD20        | L234S/L235T/G236R                             | 101.8 | 100.4 | 101.1 | 1.0   |
| 2-53   | CD20        | L234S/L235V/G236R                             | 99.9  | 109.8 | 104.9 | 7.0   |
| 2-60   | CD20        | L234T/L235Q/G236R                             | 99.7  | 98.5  | 99.1  | 0.9   |
| 2-63   | CD20        | L234T/L235T/G236R                             | 91.0  | 101.6 | 96.3  | 7.5   |
| 2-65   | CD20        | L234A/L235A (LALA)                            | 97.4  | 94.9  | 96.1  | 1.8   |
| 2-66   | CD20        | L234A/L235A/P329G (LALAPG)                    | 99.8  | 97.0  | 98.4  | 1.9   |
| 2-67   | CD20        | N297Q (aglycosyl)                             | 87.2  | 86.2  | 86.7  | 0.7   |
| 3-1    | CD3         | wild type reference                           | 100.0 | 100.0 | 100.0 | na    |
| 3-19   | CD3         | L234G/L235S/G236R                             | 105.6 | 99.2  | 102.4 | 4.5   |
| 3-52   | CD3         | L234S/L235T/G236R                             | 107.6 | 100.3 | 103.9 | 5.2   |
| 3-53   | CD3         | L234S/L235V/G236R                             | 104.2 | 97.4  | 100.8 | 4.8   |
| 3-60   | CD3         | L234T/L235Q/G236R                             | 104.0 | 97.7  | 100.8 | 4.4   |
| 3-63   | CD3         | L234T/L235T/G236R                             | 102.5 | 97.2  | 99.9  | 3.7   |
| 3-65   | CD3         | L234A/L235A (LALA)                            | 98.8  | 94.7  | 96.7  | 3.0   |
| 3-66   | CD3         | L234A/L235A/P329G (LALAPG)                    | 96.2  | 91.2  | 93.7  | 3.5   |
| 3-67   | CD3         | N297Q (aglycosyl)                             | 87.5  | 82.6  | 85.1  | 3.5   |
| 4-1    | CD52        | wild type reference                           | 100.0 | 100.0 | 100.0 | na    |
| 4-19   | CD52        | L234G/L235S/G236R                             | 123.7 | 111.7 | 117.7 | 8.5   |
| 4-52   | CD52        | L234S/L235T/G236R                             | 121.5 | 110.0 | 115.7 | 8.1   |
| 4-53   | CD52        | L234S/L235V/G236R                             | 125.3 | 112.9 | 119.1 | 8.8   |
| 4-60   | CD52        | L234T/L235Q/G236R                             | 120.7 | 108.8 | 114.8 | 8.4   |
| 4-63   | CD52        | L234T/L235T/G236R                             | 123.0 | 113.7 | 118.3 | 6.6   |
| 4-65   | CD52        | L234A/L235A (LALA)                            | 109.2 | 100.4 | 104.8 | 6.2   |
| 4-66   | CD52        | L234A/L235A/P329G (LALAPG)                    | 106.1 | 103.3 | 104.7 | 2.0   |
| 4-67   | CD52        | N297Q (aglycosyl)                             | 109.9 | 96.7  | 103.3 | 9.3   |

na = not applicable (data are normalised to 100% for wild-type reference)
