# Supplementary material for: Fc-engineered antibodies with immune effector functions completely abolished
Source: PubMed Central journal article supplement (PMC8691596; doi:10.1371/journal.pone.0260954), 2021-12-21
Supplement: pone.0260954.s006.pdf [file pone.0260954.s006.pdf]

S6 Table: Yield and purity of variant antibodies produced from HEK cells

| Sample | Amino acid alterations and sample description | Yield (mg) | Yield (relative to wt) | Purity by SEC-HPLC (%) |
|--------|-----------------------------------------------|------------|------------------------|------------------------|
| 2-1    | wild type                                     | 2.6        | 1.00                   | 97.7                   |
| 2-2    | L234A/L235A/G236R                             | 2.6        | 1.14                   | 97.6                   |
| 2-3    | L234A/G236R                                   | 2.8        | 1.00                   | 97.7                   |
| 2-4    | L234A/L235S/G236R                             | 2.5        | 0.94                   | 98.0                   |
| 2-5    | L234A/L235T/G236R                             | 2.6        | 0.98                   | 97.7                   |
| 2-6    | L234D/L235H/G236R                             | 2.9        | 1.21                   | 97.6                   |
| 2-7    | L234D/L235K/G236R                             | 2.6        | 1.28                   | 97.4                   |
| 2-8    | L234D/G236R                                   | 3.0        | 1.75                   | 97.8                   |
| 2-9    | L234D/L235Q/G236R                             | 2.8        | 1.45                   | 97.8                   |
| 2-10   | L234D/L235S/G236R                             | 2.5        | 0.97                   | 97.1                   |
| 2-11   | L234D/L235T/G236R                             | 3.1        | 1.45                   | 97.6                   |
| 2-12   | L234E/L235D/G236R                             | 2.7        | 1.13                   | 97.8                   |
| 2-13   | L234E/L235H/G236R                             | 2.9        | 1.07                   | 97.7                   |
| 2-14   | L234E/L235I/G236R                             | 2.4        | 1.15                   | 97.8                   |
| 2-15   | L234E/G236R                                   | 2.6        | 1.06                   | 97.9                   |
| 2-16   | L234E/L235V/G236R                             | 2.4        | 1.00                   | 97.9                   |
| 2-17   | L234G/L235H/G236R                             | 2.5        | 1.08                   | 98.1                   |
| 2-18   | L234G/L235Q/G236R                             | 2.6        | 1.16                   | 97.8                   |
| 2-19   | L234G/L235S/G236R                             | 3.0        | 1.19                   | 98.1                   |
| 2-20   | L234H/L235I/G236R                             | 2.9        | 1.33                   | 97.5                   |
| 2-21   | L234H/L235S/G236R                             | 2.6        | 1.07                   | 98.2                   |
| 2-22   | L234K/L235Q/G236R                             | 1.6        | 0.67                   | 98.1                   |
| 2-23   | L234K/L235R/G236R                             | 2.6        | 0.65                   | 98.2                   |
| 2-24   | L234K/L235S/G236R                             | 1.9        | 0.69                   | 98.4                   |
| 2-25   | L234K/L235T/G236R                             | 2.2        | 0.81                   | 97.6                   |
| 2-26   | L234K/L235V/G236R                             | 1.8        | 0.71                   | 98.1                   |
| 2-27   | L234Q/L235A/G236R                             | 2.0        | 0.57                   | 98.1                   |
| 2-28   | L234Q/L235D/G236R                             | 1.4        | 0.49                   | 95.7                   |
| 2-29   | L234Q/L235H/G236R                             | 1.8        | 0.54                   | 98.0                   |
| 2-30   | L234Q/G236R                                   | 1.8        | 0.43                   | 98.0                   |
| 2-31   | L234Q/L235Q/G236R                             | 1.5        | 0.53                   | 95.8                   |
| 2-32   | L234Q/L235R/G236R                             | 1.5        | 0.60                   | 98.3                   |
| 2-33   | L234Q/L235S/G236R                             | 1.4        | 0.55                   | 97.8                   |
| 2-34   | L234Q/L235T/G236R                             | 1.9        | 0.72                   | 97.9                   |
| 2-35   | L234Q/L235V/G236R                             | 1.6        | 0.68                   | 97.3                   |
| 2-36   | L234R/L235D/G236R                             | 2.0        | 0.71                   | 97.4                   |
| 2-37   | L234R/L235E/G236R                             | 2.0        | 0.73                   | 98.2                   |
| 2-38   | L234R/L235H/G236R                             | 1.8        | 0.57                   | 98.1                   |
| 2-39   | L234R/L235I/G236R                             | 1.8        | 0.55                   | 98.4                   |
| 2-40   | L234R/L235K/G236R                             | 1.5        | 0.46                   | 98.6                   |
| 2-41   | L234R/G236R                                   | 1.8        | 0.57                   | 98.2                   |
| 2-42   | L234R/L235Q/G236R                             | 1.9        | 0.65                   | 98.4                   |
| 2-43   | L234R/L235R/G236R                             | 2.2        | 0.85                   | 98.4                   |
| 2-44   | L234R/L235T/G236R                             | 1.9        | 0.69                   | 98.4                   |
| 2-45   | L234S/L235D/G236R                             | 2.5        | 0.96                   | 98.0                   |
| 2-46   | L234S/L235E/G236R                             | 2.4        | 0.86                   | 98.0                   |
| 2-47   | L234S/L235G/G236R                             | 2.3        | 0.82                   | 97.7                   |
| 2-48   | L234S/L235H/G236R                             | 2.6        | 1.16                   | 98.2                   |
| 2-49   | L234S/L235I/G236R                             | 2.7        | 1.14                   | 98.0                   |
| 2-50   | L234S/G236R                                   | 3.0        | 1.39                   | 98.0                   |
| 2-51   | L234S/L235R/G236R                             | 2.7        | 1.31                   | 97.8                   |
| 2-52   | L234S/L235T/G236R                             | 2.7        | 1.36                   | 97.8                   |
| 2-53   | L234S/L235V/G236R                             | 2.5        | 1.22                   | 98.1                   |
| 2-54   | L234T/L235A/G236R                             | 1.6        | 0.84                   | 98.1                   |
| 2-55   | L234T/L235D/G236R                             | 1.7        | 0.81                   | 97.7                   |
| 2-56   | L234T/L235H/G236R                             | 2.3        | 0.86                   | nd                     |
| 2-57   | L234T/L235I/G236R                             | 2.1        | 0.82                   | nd                     |
| 2-58   | L234T/L235K/G236R                             | 2.1        | 0.82                   | nd                     |
| 2-59   | L234T/G236R                                   | 3.0        | 1.28                   | nd                     |
| 2-60   | L234T/L235Q/G236R                             | 2.6        | 1.31                   | 98.2                   |
| 2-61   | L234T/L235R/G236R                             | 2.9        | 1.50                   | 97.9                   |
| 2-62   | L234T/L235S/G236R                             | 2.6        | 1.29                   | 97.8                   |
| 2-63   | L234T/L235T/G236R                             | 2.7        | 1.35                   | 97.7                   |
| 2-64   | L234T/L235V/G236R                             | 2.0        | 0.80                   | 97.7                   |
| 2-65   | L234A/L235A                                   | 1.7        | 0.76                   | 97.8                   |
| 2-66   | L234A/L235A/P329G (LALAPG)                    | 2.6        | 1.04                   | 97.7                   |
| 2-67   | N297Q (aglycosyl)                             | 2.4        | 1.00                   | 97.9                   |
| 2-68   | G236R/L328R                                   | 2.5        | 1.04                   | 98.1                   |
| 2-69   | L234A/G237A                                   | 3.0        | 1.35                   | 97.5                   |
| 2-71   | L234A/L235E                                   | 3.4        | 1.58                   | 98.0                   |
| 2-72   | L235V/F243L/R292P/Y300L/P396L                 | 2.6        | 1.13                   | 97.5                   |
| 2-73   | D265A/P329A                                   | 2.4        | 1.05                   | nd                     |
| 2-74   | L234A/L235A/K322A                             | 4.1        | 1.74                   | nd                     |
| 2-75   | L234F/L235E/P331S                             | 2.6        | 1.42                   | nd                     |
| 2-76   | L234F/L235Q/K322Q                             | 2.4        | 1.03                   | nd                     |
| 2-77   | L234A/L235A/G237A/P238S/H268A/A330S/P331S     | 3.0        | 1.10                   | nd                     |
| 2-78   | E233P/L234V/L235A/G236A/A327G/A330S/P331S     | 2.5        | 1.01                   | nd                     |
| 2-79   | L235A/G236R                                   | 2.6        | 1.11                   | nd                     |
| 2-80   | L235S/G236R                                   | 2.8        | 1.42                   | nd                     |
| 2-81   | G236R                                         | 2.7        | 1.10                   | nd                     |

nd = not done
