# Supplementary material for: Fc-engineered antibodies with immune effector functions completely abolished
Source: PubMed Central journal article supplement (PMC8691596; doi:10.1371/journal.pone.0260954), 2021-12-21
Supplement: pone.0260954.s007.pdf [file pone.0260954.s007.pdf]

**S7 Table: Yield and purity of variant antibodies produced from CHO cells**

| <b>Sample</b> | <b>Amino acid alterations and sample description</b> | <b>Yield (mg/L)</b> | <b>Yield (relative to wt)</b> | <b>Purity by SEC-HPLC (%)</b> |
|---------------|------------------------------------------------------|---------------------|-------------------------------|-------------------------------|
| 5-1           | wild type                                            | 774.5               | 1.00                          | 91.1                          |
| 5-52          | L234S/L235T/G236R                                    | 963.7               | 1.24                          | 90.2                          |
| 5-65          | L234A/L235A (LALA)                                   | 897.9               | 1.16                          | 88.7                          |
