# Supplementary material for: Fc-engineered antibodies with immune effector functions completely abolished
Source: PubMed Central journal article supplement (PMC8691596; doi:10.1371/journal.pone.0260954), 2021-12-21
Supplement: pone.0260954.s008.pdf [file pone.0260954.s008.pdf]

**S8 Table: Preliminary screen of variant antibodies binding to human FcγRI.**

| <b>Sample</b> | <b>Amino acid alterations</b>               | <b>Binding response (RU)</b> |
|---------------|---------------------------------------------|------------------------------|
| Ab00126-10.0  | wild type                                   | 391.7                        |
| Ab00126-10.16 | L234A/L235A (LALA)                          | 58.7                         |
| Ab00126-10.2  | N297Q                                       | 47.0                         |
| Ab00126-10.3  | L234Q/L235S                                 | 8.2                          |
| Ab00126-10.58 | D265A                                       | 167.5                        |
| Ab00126-10.75 | L234A/L235A/P329G (LALAPG)                  | 2.3                          |
| Ab00126-10.77 | L234Q/L235S/G236R                           | -0.2                         |
| Ab00126-10.79 | L234A/L235A/K322A                           | 52.2                         |
| Ab00126-10.80 | L234F/L235E/P331S                           | 37.5                         |
| Ab00126-10.81 | L234F/L235Q/K322Q                           | 72.8                         |
| Ab00126-c578  | L234Q/L235S/G236K                           | 2.2                          |
| Ab00126-c580  | L234Q/L235S/G236E                           | 0.5                          |
| Ab00126-c583  | L234Q/L235S/G236K/L328P/A330P               | 0.8                          |
| Ab00126-c584  | G236R/L328R                                 | 0.7                          |
| Ab00126-c585  | L234A/L235A/G237A/P238S/H268A/A330S/P331S   | 11.4                         |
| Ab00126-c586  | E233P/L234V/L235A/G236del/A327G/A330S/P331S | 0.9                          |

Samples of purified antibodies were injected over immobilised FcγRI for 1 min at 30 μL/min and allowed to disassociate for 3 min. The mean SPR signal (relative to the reference cell) was measured approximately 5 seconds before the end of injection (response). The blank (buffer) response was subtracted to give a corrected binding response for each test sample. This preliminary experiment was carried out using a Biacore 3000 which is less sensitive than the Biacore T200 used in the rest of the study. Furthermore, the test samples were not replicated.
